# Supplementary material for: A phosphonium-type ionic liquid-modified Au electrode: a new platform for entrapping functional molecules on substrate surfaces
Source: Royal Society of Chemistry journal article supplement (doi:10.1039/c3cc45251d), 2013-01-01
Supplement: c3cc45251d.pdf [file c3cc45251d.pdf]

## Supplementary Information

**Chemicals.** All reagents and organic solvents were purchased from Wako Pure Chemical Industries, Ltd., TCI, Kanto Chemical Co., Inc., and Nakalai Tesque and were used without further purification. Milli-Q water was obtained using a Millipore Biocel system connected to an EYELA SA-2100E automated water distillation apparatus.

**Apparatus.**  $^1\text{H}$  NMR spectra were measured on a Varian Gemini 300 MHz NMR spectrometer in  $\text{CDCl}_3$  or  $\text{D}_2\text{O}$  with TMS or DSS as internal reference standards. The concentration of each sample was adjusted to about 10 mM in a sample tube ( $\varnothing$  5 mm). Fourier transform infrared (FT-IR) spectra were measured using a JASCO FT/IR-4200 spectrometer. Attenuated total reflection spectra were measured using a JASCO ATR PRO410-S attachment. Reflection-adsorption spectra were measured using a JASCO RAS-PRO410-H attachment. Electrospray ionization-time of flight (ESI-TOF) mass spectra were obtained with a LCT ESI-TOF spectrometer (Micromass).

**Electrochemistry.** Electrochemical measurements were performed using a Hokutodenko HZ-5000 electrochemical analyzer. The cyclic voltammograms were recorded using either a glassy carbon electrode or each SAM as a working electrode, a Pt wire as a counter electrode and an Ag/AgCl (3 M NaCl) as a reference electrode. A 0.1 M solution of  $\text{NaClO}_4$  was used as the electrolyte.

**Detailed preparation of the ionic liquid with disulphide group 1.** The procedures used in the preparation of **1** are summarized in Scheme S1.

**Preparation of 12-bromododecyl(trihexyl)phosphonium bromide.** 1,12-dibromododecane (18.3 mmol) was completely dissolved in toluene (60 mL) under Ar. A toluene solution (60 mL) of trihexylphosphine (18.3 mmol) was added dropwise to this solution over the course of 2 h. The resultant solution was stirred for 68 h under Ar at room temperature and then the reaction mixture was evaporated completely. The resulting highly viscous yellow oil was purified by silica gel column chromatography (eluent:  $\text{AcOEt}/\text{MeOH} = 9/1$ ). After evaporation to dryness, a viscous yellow oil was obtained. Yield 46.3%.  $^1\text{H}$ -NMR (300 MHz,  $\text{CDCl}_3$ , vs. TMS):  $\delta$  0.90 (m, 9H,  $-\text{CH}_3$ ), 1.20-2.30 (m, 44H,  $-\text{CH}_2-$ ), 2.45 (m, 8H,  $-\text{P}^+\text{CH}_2-$ ), 3.42 (t, 2H,  $\text{BrCH}_2-$ ). FT-IR (ATR (Ge),  $\text{cm}^{-1}$ ): 2954, 2926, 2855 ( $\nu_{\text{C-H}}$  of the methylene group and the methyl group), 1457 ( $\delta_{\text{C-H}}$  of the methylene group). ESI TOF-MS (positive mode):  $m/z = 535.5$  [ $\text{M} - \text{Br}$ ] $^+$ .

**12-Thiuroniumdodecyl(trihexyl)phosphonium dibromide.** Thiourea (4.05 mmol) and 12-bromododecyl(trihexyl)phosphonium bromide (3.30 mmol) was dissolved in EtOH (50 mL) and refluxed for 2 days at 90 °C. The resultant solution was evaporated completely. The residue was dissolved in CHCl<sub>3</sub> (200 mL) and washed with H<sub>2</sub>O (100 mL x 3) and brine (100 mL). After drying over anhydrous MgSO<sub>4</sub>, a viscous pale yellow liquid was obtained by evaporation. This liquid was purified by silica gel column chromatography (eluent: CHCl<sub>3</sub>/MeOH (9/1v/v)). After evaporation to dryness, a viscous yellow liquid was obtained. Yield 33.0%. <sup>1</sup>H-NMR (300 MHz, CDCl<sub>3</sub>, vs. TMS): δ 0.90 (m, 9H, -CH<sub>3</sub>), 1.25-1.84 (m, 44H, -CH<sub>2</sub>-), 2.31-2.58 (m, 8H, -P<sup>+</sup>CH<sub>2</sub>-), 3.39 (t, 2H, BrCH<sub>2</sub>-), 9.00 (br, 4H, -C<sup>+</sup>NH<sub>2</sub>). FT-IR (ATR (Ge), cm<sup>-1</sup>): 2956, 2923, 2853 (ν<sub>C-H</sub> of the methylene group and the methyl group), 1652 (δ<sub>N-H</sub> of the amino group), 1458 (δ<sub>C-H</sub> of the methylene group), 743 (ν<sub>C-S</sub>). ESI TOF-MS (positive mode): m/z = 529.7 [M - H - 2Br]<sup>+</sup>, 265.3 [M - 2Br]<sup>2+</sup>.

**Bis[12-(trihexylphosphonium)dodecyl]disulphane dibromide.** 12-Thiuroniumdodecyl-(trihexyl)phosphonium dibromide (1.03 mmol) was dissolved in EtOH (30 mL). An aqueous solution (10 mL) of NaOH (2.20 mmol) was added to this solution. The resultant solution was stirred for 4 days at room temperature. After evaporation, the residue was dissolved in CHCl<sub>3</sub> (80 mL) and washed with H<sub>2</sub>O (50 mL x 3) and brine (50 mL). After drying over anhydrous MgSO<sub>4</sub>, the solution was evaporated completely. The resulting yellow viscous liquid was purified by silica gel chromatography (eluent: AcOEt/MeOH 9/1(v/v) (1st) and CHCl<sub>3</sub>/MeOH (9/1(v/v) (2nd)). After evaporation to dryness, a yellow viscous liquid was obtained. Yield 76.5%. <sup>1</sup>H-NMR (300 MHz, CDCl<sub>3</sub>, vs. TMS): δ 0.90 (m, 18H, -CH<sub>3</sub>), 1.25-1.71 (m, 88H, -CH<sub>2</sub>-), 2.45 (m, 16H, -P<sup>+</sup>CH<sub>2</sub>-), 2.68 (t, 4H, -SCH<sub>2</sub>-). FT-IR (ATR (Ge), cm<sup>-1</sup>): 2955, 2926, 2856 (ν<sub>C-H</sub> of the methylene group and the methyl group), 1465 (δ<sub>C-H</sub> of the methylene group), 748 (ν<sub>C-S</sub>). ESI TOF-MS (positive mode): m/z = 1054.0 [M - Br]<sup>+</sup>, 486.5 [M - 2Br]<sup>2+</sup>.

**Bis[12-(trihexylphosphonium)dodecyl]disulfane bis(trifluoromethanesulfonate)**  
1. Bis[12-(trihexylphosphonium)dodecyl]disulphane dibromide (0.394 mmol) was dissolved in CHCl<sub>3</sub> (25 mL). A EtOH solution (15 mL) of NaTfO (0.860 mmol) was added to the solution. The resultant mixture was stirred at room temperature until the TLC spot of starting material disappeared (eluent: CHCl<sub>3</sub>/MeOH = 4/1, R<sub>F</sub> = 0.7). After removal of the white precipitate (NaBr), the solution was evaporated completely. The

residue was dissolved in  $\text{CHCl}_3$  (100 mL) and washed with  $\text{H}_2\text{O}$  (100 mL x 3). After drying over anhydrous  $\text{MgSO}_4$ , the solution was evaporated completely. A pale yellow viscous liquid was obtained. Yield 82 %.  $^1\text{H-NMR}$  (300 MHz,  $\text{CDCl}_3$ , vs. TMS):  $\delta$  0.90 (m, 18H,  $-\text{CH}_3$ ), 1.25-1.69 (m, 88H,  $-\text{CH}_2-$ ), 2.20 (m, 16H,  $-\text{P}^+\text{CH}_2-$ ), 2.69 (t, 4H,  $-\text{SCH}_2-$ ). FT-IR (ATR (Ge),  $\text{cm}^{-1}$ ): 2957, 2927, 2855 ( $\nu_{\text{C-H}}$  of the methylene group and the methyl group), 1465 ( $\delta_{\text{C-H}}$  of the methylene group), 1260 ( $\nu_{\text{C-F}}$  of  $\text{TfO}^-$ ), 1153 sulfonate ( $\nu_{\text{SO}_3^-}$  of  $\text{TfO}^-$ ), 1030 ( $\nu_{\text{S=O}}$  of  $\text{TfO}^-$ ), 748 ( $\nu_{\text{C-S}}$ ). ESI TOF-MS (positive mode):  $m/z = 1121.7 [\text{M} - \text{TfO}^-]^+$ ,  $486.3 [\text{M} - 2 \text{TfO}^-]^{2+}$ .

**Preparation of 1/Au.** Au film with a thickness of 1,000 Å was deposited onto a cleaved mica substrate (14 × 14 mm) at  $1.0 \text{ Å s}^{-1}$  with a JIS-300AK vacuum coater (Sinku of Technology Co., Ltd.). The Au film was annealed with a hydrogen gas flame before it was dipped into each sample solution. A few drops of **1** were directly casted onto the Au film and the Au film was allowed to stand for a few days. After removal of excess **1** by washing with EtOH and  $\text{CHCl}_3$ , **1/Au** was obtained.

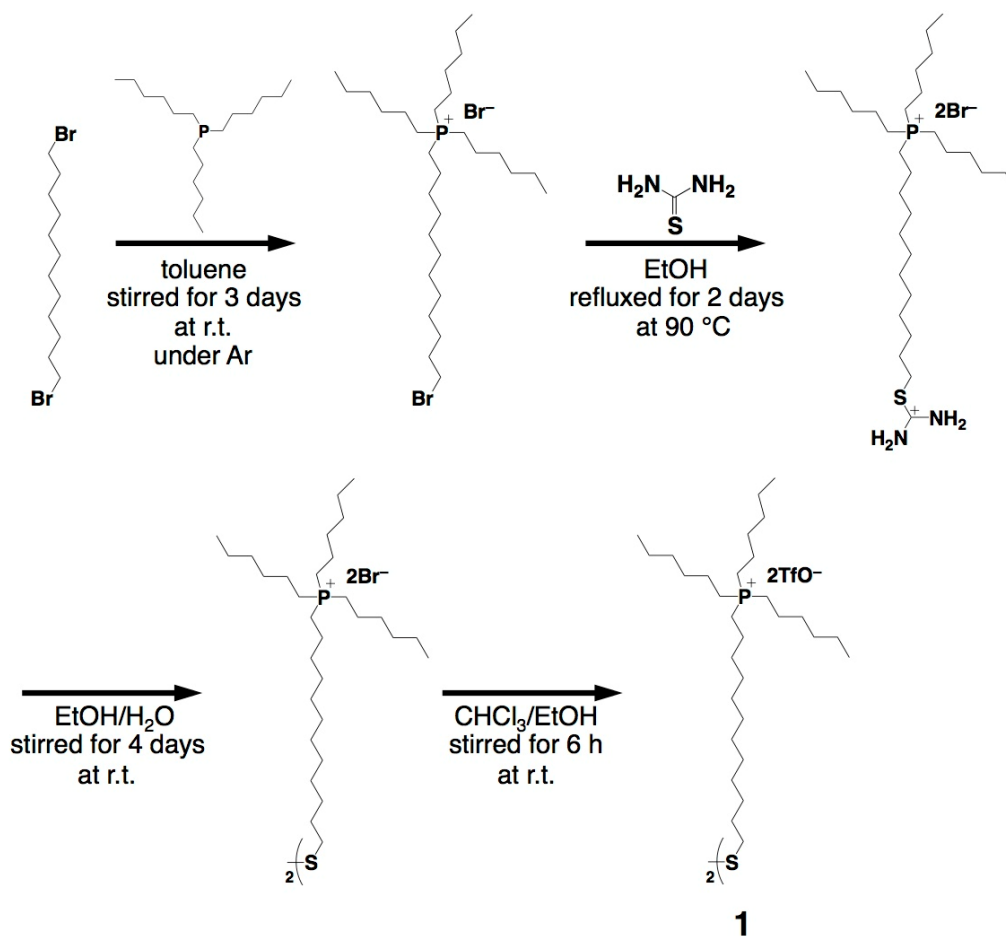

**Scheme S1** Synthetic scheme for preparation of the ionic liquid containing the disulphide group, **1**.

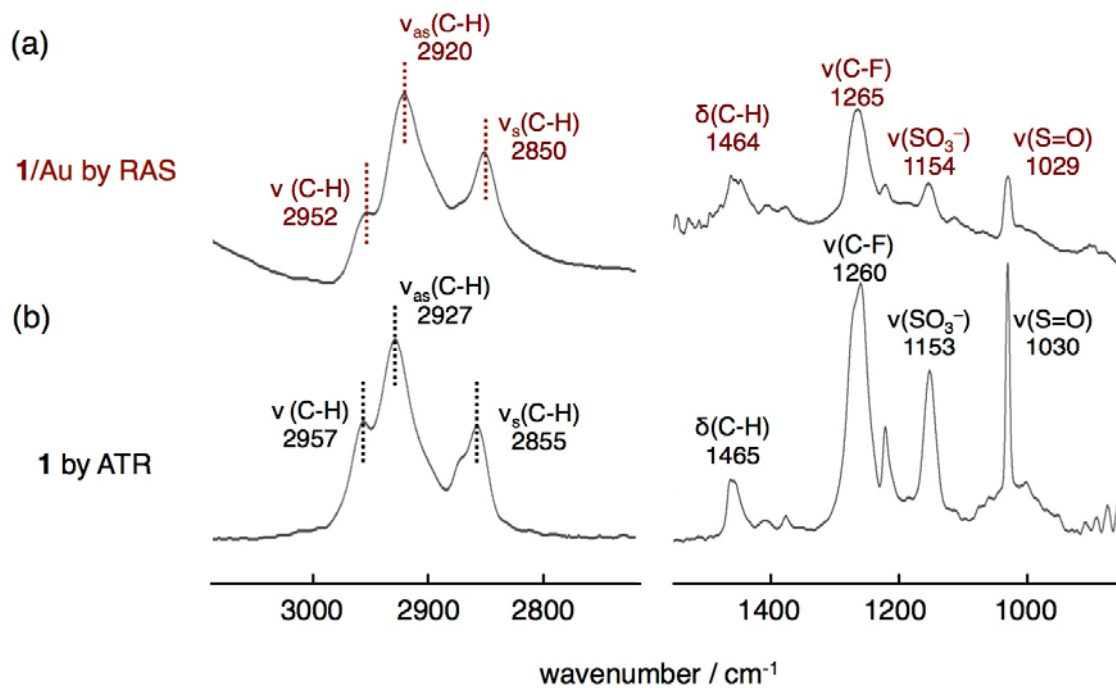

**Fig. S1** FT-IR spectra of (a) **1/Au** (IR-RAS method) and (b) **1** (ATR method). (Left) C-H stretching vibration region. (Right) C-H deformation and counter anion regions of  $\text{TfO}^-$ .

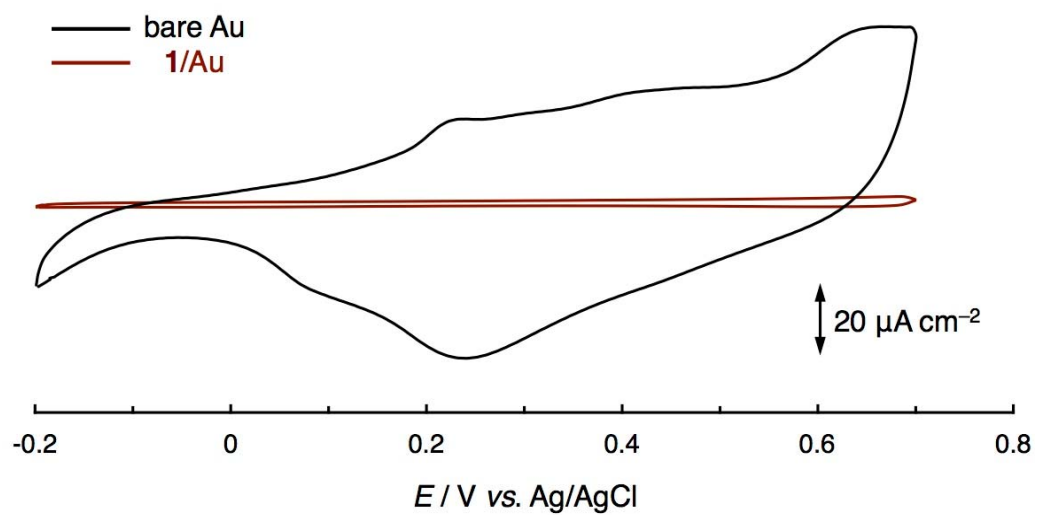

**Fig. S2** Cyclic voltammograms of the bare Au electrode (black line) and 1/Au (red line) in 0.1 M  $NaClO_4$  aq.

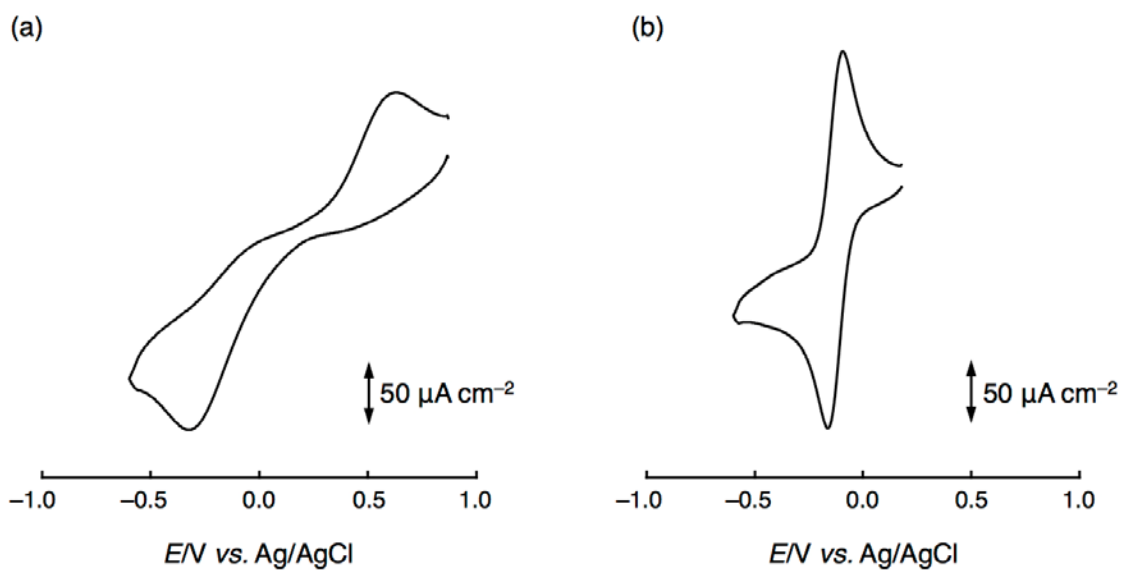

**Fig. S3** Cyclic voltammogram of 1/Au in 0.1 M NaClO<sub>4</sub> (scan rate = 0.1 V s<sup>-1</sup>) containing 0.5 mM (a) [Fe(CN)<sub>6</sub>]<sup>3-</sup> and (b) [Ru<sup>II</sup>(NH<sub>3</sub>)<sub>6</sub>]<sup>2+</sup>.

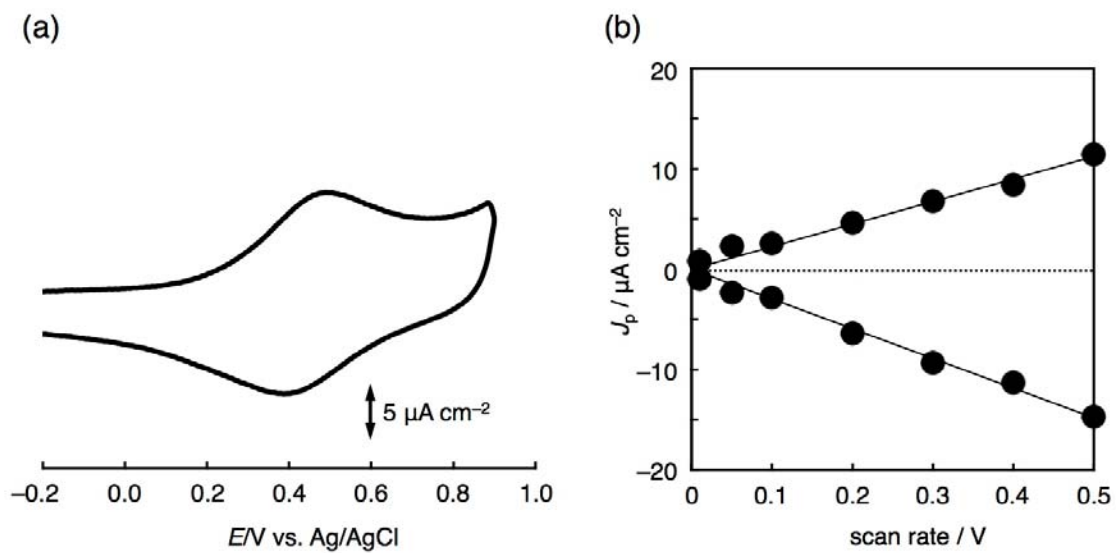

**Fig. S4** (a) Cyclic voltammogram of **Fe@1/Au** in 0.1 M  $\text{NaClO}_4$  (scan rate =  $0.1 \text{ V s}^{-1}$ ).  
(b) The linear relationship between scan rates and peak current densities of  $[\text{Fe}^{\text{II}}(\text{CN})_6]^{4-}$  /  $[\text{Fe}^{\text{III}}(\text{CN})_6]^{3-}$ .



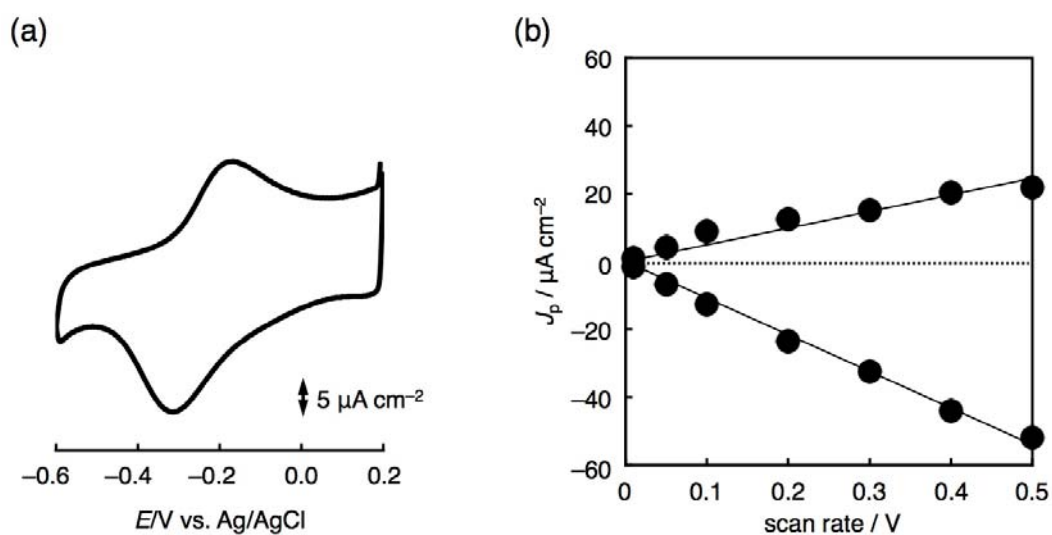

**Fig. S5** (a) Cyclic voltammogram of **Ru@1/Au** in 0.1 M  $\text{NaClO}_4$  (scan rate =  $0.1 \text{ V s}^{-1}$ ).  
(b) The linear relationship between scan rates and peak current densities of  $[\text{Ru}^{\text{II}}(\text{NH}_3)_6]^{2+}/[\text{Ru}^{\text{III}}(\text{NH}_3)_6]^{3+}$ .
